# Supplementary material for: Antimicrobial Resistance of Enterococcus sp. Isolated from Sheep and Goat Cheeses
Source: MDPI journal article supplement (doi:10.3390/foods10081844), 2021-08-10
Supplement: s1 [file s1]

## Supplementary Materials

**Table S1.** Descriptions of primers used in this study.

| Primer name             | Primer sequence (5'-3')  | Annealing temperature (°C) | Size of PCR product | Reference |
|-------------------------|--------------------------|----------------------------|---------------------|-----------|
| <i>Enterococcus sp.</i> |                          |                            |                     |           |
| Ent1                    | TACTGACAAACCATTCATGATG   | 55                         | 112                 | [19]      |
| Ent2                    | AACTTCGTCACCAACGCGAAC    |                            |                     |           |
| <b>Internal control</b> |                          |                            |                     |           |
| InKo1                   | GGAGGAAGGTGGGA TGAGG     | 55                         | 241                 | [20]      |
| InKo2                   | ATGGTGTGACGGGCGGTGTG     |                            |                     |           |
| <b>Resistance</b>       |                          |                            |                     |           |
| vanA F                  | TCTGCAATAGAGATAGCCGC     | 52                         | 377 bp              | [24]      |
| vanA R                  | GGAGTAGCTATCCCAGCATT     |                            |                     |           |
| ermAF                   | TAACATCAGTACGGATATTG     | 54                         | 200 bp              | [25]      |
| ermAR                   | CTGGATAAAATTTGGGTGGA     |                            |                     |           |
| ermBF                   | CCGAACACTAGGGTTGCTC      | 54                         | 139 bp              | [25]      |
| ermBR                   | ATCTGGAACATCTGTGGTATG    |                            |                     |           |
| ermCF                   | TCAAAACATAATATAGATAAA    | 50                         | 642 bp              | [26]      |
| ermCR                   | GCTAATATTGTTTAAATCGTCAAT |                            |                     |           |
| msrCF                   | GCAAATGGTGTAGGTAAGACAAC  | 51                         | 399                 | [26]      |
| msrCR                   | ATCATGTGATGTAAACAAAAT    |                            |                     |           |
|                         |                          |                            |                     | [27]      |

Figure S1

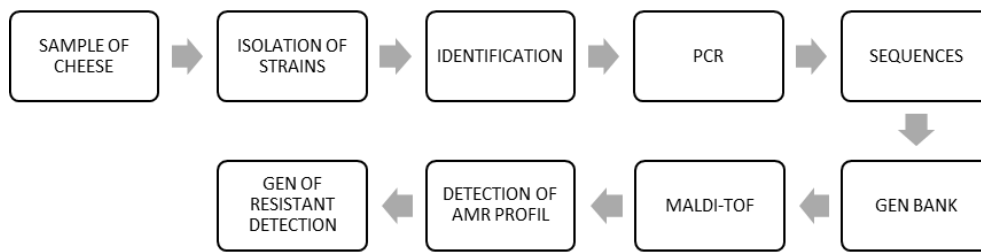

**Figure S1.** Workflow of detection resistant enterococci from cheeses samples.

Figure S2

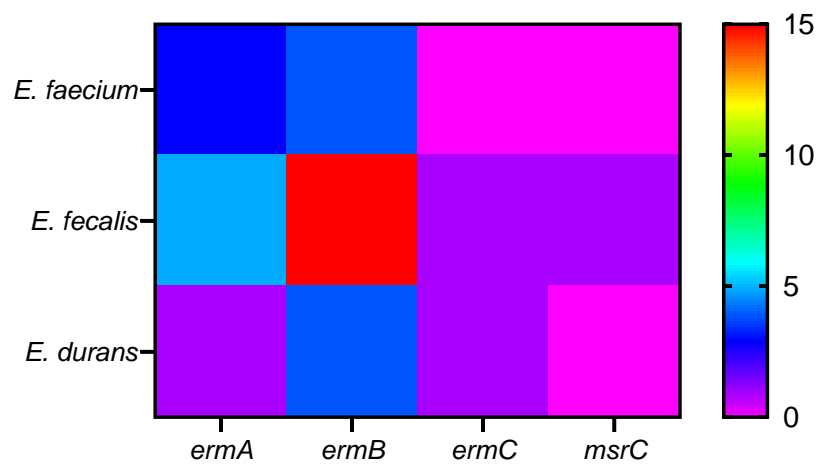

**Figure S2.** Heatmap demonstration of the presence and absence of genes across species.
